# Supplementary material
Source: PubMed Central journal article supplement (PMC9998440)
Supplement: 41598_2023_30984_MOESM1_ESM.pdf [file 41598_2023_30984_MOESM1_ESM.pdf]

## Supplements

Table S1: Study Tiers

| Study Tier | Tier description                                                                                                        | Number of data sources fitting category (N = 127)<br>N (%) | Study end year (range) |
|------------|-------------------------------------------------------------------------------------------------------------------------|------------------------------------------------------------|------------------------|
| 1          | Regional or national surveillance repositories or annual country report                                                 | 89 (70.1)                                                  | 2014–2019              |
| 2          | Published report in peer-reviewed literature or on a ministry of health site that includes data from the entire country | 34 (26.8)                                                  | 2004–2019              |
| 3          | One time study examining rabies prevalence or similar objective OR a published report including a region of a country   | 3 (2.4)                                                    | 2012–2014              |
| 4          | Other                                                                                                                   | 1 (0.8)                                                    | 2014                   |
